# Supplementary material
Source: PubMed Central journal article supplement (PMC3281620)
Supplement: supp_M111.297192_jbc.M111.297192-1.pdf [file supp_M111.297192_jbc.M111.297192-1.pdf]

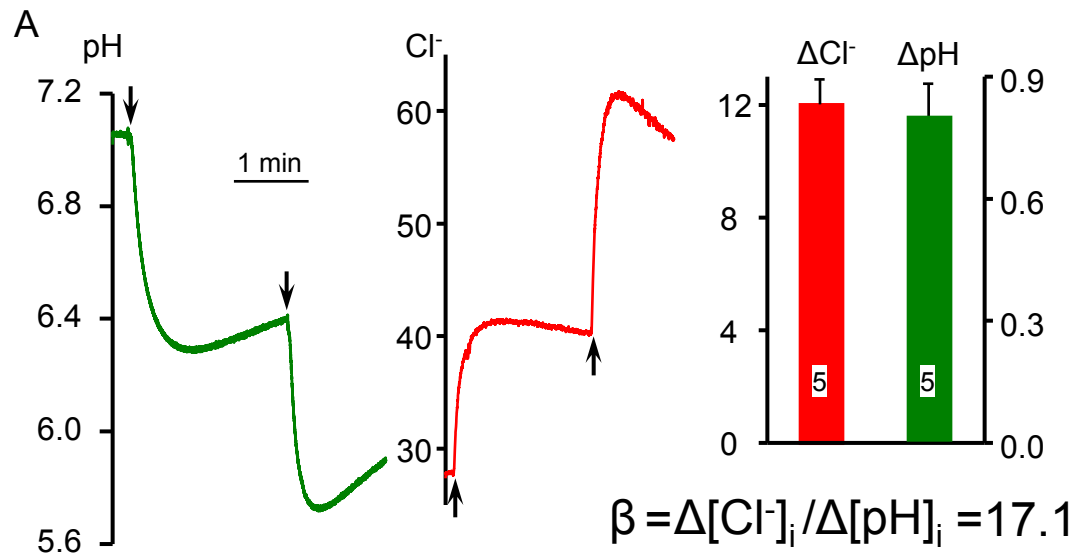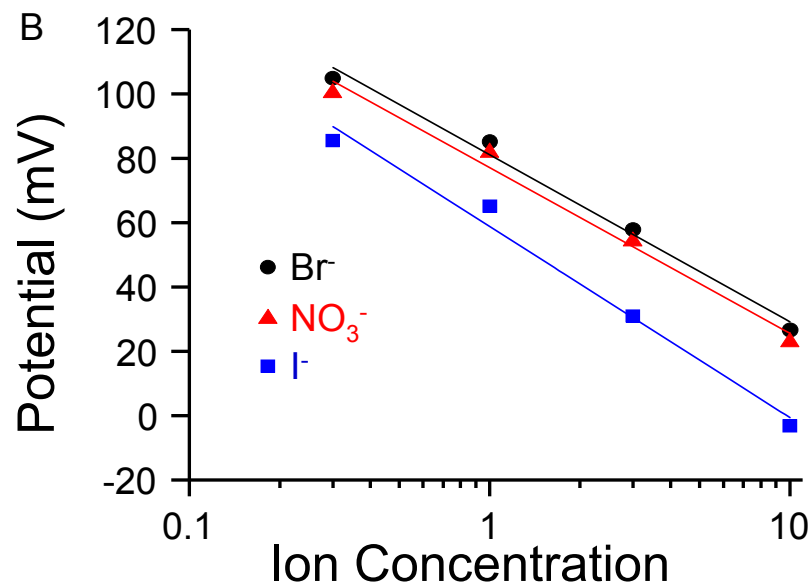

**Supplementary Fig.: S1: Direct measurement of buffer capacity and the anionic response of the resin. (A)** Example traces of  $\text{pH}_{in}$  (green) and  $\text{Cl}^-_{in}$  (red) changes in *Xenopus* oocytes injected twice with 13.8 nL of 100 mM HCl. The average changes in  $\text{Cl}^-_{in}$  and  $\text{pH}_{in}$  were used to calculate the oocytes intrinsic buffer capacity. **(B)** Response of the anion-specific resin to the indicated concentration of Br<sup>-</sup> (●), NO<sub>3</sub><sup>-</sup> (▲) and I<sup>-</sup> (■).
