# Supplementary material
Source: PubMed Central journal article supplement (PMC3281620)
Supplement: supp_M111.297192_jbc.M111.297192-2.pdf [file supp_M111.297192_jbc.M111.297192-2.pdf]

|                        |     |                                                                                                          |
|------------------------|-----|----------------------------------------------------------------------------------------------------------|
| SLC26A8_H.sapiens      | 334 | TLIDMIFYSFLLPVTFDFSLLPKIILOAFSLSTVSSFLLIFLGGKIIASLHNYSVNSNODLIATGLCNVVSFFRSCVFTGAIARTIIQDKSGGRQOFA       |
| SLC26A8_M.musculus     | 334 | TLIDMIFYSFLLPVTFDFSLLPKIILOAFSLSTVSSFLLIFLGGKIIASLHNYSVNSNODLIATGLCNVVSFFRSCVFTGAIARTIIQDKSGGRQOFA       |
| SLC26A3_M.musculus     | 309 | AVVGNMSICFQPPITPVEVFQDTIGDSFGIATVGFVAVAFSVASVYSLKYDYPIDGNOELIATGLCVSNIFTGAEKGFAGSTALSRSVQESTGGKTOVA      |
| SLC26A3_R.norvegicus   | 309 | AVVGNMSICFQPPITPVEVFQDTIGDCFGIATVGFVAVAFSVASVYSLKYDYPIDGNOELIATGLCVSNIFTGAEKGFAGSTALSRSVQESTGGKTOVA      |
| SLC26A3_O.cuniculus    | 308 | SVIGKMEKGFQAPAAPDTQVFDAGIDCFITIAIVGFVAVAFSVASVYSLKYDYPIDGSOELIATGLGNIVTGSFKGFAGSTALSRSVQESTGGKTOVA       |
| SLC26A3_H.sapiens      | 316 | AVVCDMNECFQPPITPVEVFQNTVGDVCFIATVAVAFVAVAFSVASVYSLKYDYPIDGNOELIATGLGNIVCVVGRGFAGSTALSRSVQESTGGKTOIA      |
| SLC26A4_M.musculus     | 326 | GIVKSIPTSCFLPPVLPVSLVGLFSDMLAASFIAVVAIAIIVSVGKQVYATKHDYVIDGNOEFTAFGICSNVFSGFSCFVATTALSRVAVQESTGGKTOVA    |
| SLC26A4_R.norvegicus   | 326 | GIVKSIPTSCFLPPVLPVSLVGLFSDMLAASFIAVVAIAIIVSVGKQVYATKHDYVIDGNOEFTAFGICSNVFSGFSCFVATTALSRVAVQESTGGKTOVA    |
| SLC26A4_H.sapiens      | 326 | GIVKSIPTSCFLPPVLPVSLVGLFSDMLAASFIAVVAIAIIVSVGKQVYATKHDYVIDGNOEFTAFGICSNVFSGFSCFVATTALSRVAVQESTGGKTOVA    |
| SLC26A4_X.leavis       | 310 | GIKTIPTSCFIPAMSPDVSLFSSLISSAFSTGTIVAYAVIIVSVGKQVYATKNNYRVDGNOEFTAFGICSNMFGGTFSCFCASTALSRVAVQESTGGKSOIA   |
| SLC26A3_X.leavis       | 330 | GTVKNIPSCFIPPMMPDVSMFPQIISSAISIGIVAYAVAVSLGKVEATKKNYVAIDGNOEFTAFGICSNVFSGFSCFVATTALSRVAVQESTGGKTOIA      |
| SLC26A5_M.unguiculatus | 316 | DVVGTIPICLLPPANEDTSLFHLVYVDAIAIAIIVGFVSVTISMAKTLANKHGYQVDGNOELIATGLCNSIGSLFQTFESISCSLSRSLVQESTGGKTOIA    |
| SLC26A5_M.musculus     | 316 | DVVGTIPICLLPPANEDTSLFHLVYVDAIAIAIIVGFVSVTISMAKTLANKHGYQVDGNOELIATGLCNSIGSLFQTFESISCSLSRSLVQESTGGKTOIA    |
| SLC26A5_H.sapiens      | 316 | DVVGTIPICLLPPANEDTSLFHLVYVDAIAIAIIVGFVSVTISMAKTLANKHGYQVDGNOELIATGLCNSIGSLFQTFESISCSLSRSLVQESTGGKTOIA    |
| SLC26A5_D.rerio        | 319 | DVVGKIPTICLLPPKVEDFVFPNLFADAVPIAVVGFVSVTISLAKTFALKYGYVSDGNOELIATGLCNFVVSFFHTEFVVATASMSRSLVQESTGGHTETA    |
| SLC26A6_H.sapiens      | 300 | DVVGNIPACLVPVPAENTQLFSKLVGSAFTIIVVGFVAVAIISLGIKIFALRHGYRVDGNOELIATGLSNLIGGTFQCFPVVSCMSRSLVQESTGGNSOVA    |
| SLC26A6_S.scrofa       | 322 | DVVGRIPACLVPVPAEPQFLFARLVGNFAFAIIVVGFVAVAIISLGIKIFALRHGYRVDGNOELIATGLSNFIGGTFQCFPVVSCMSRSLVQESTGGNSOVA   |
| SLC26A6_M.musculus     | 299 | DVVGNITTCGLIPPVVAKTELFAITLVGNFAFAIIVVGFVAVAIISLGIKIFALRHGYRVDGNOELIATGLSNLIGGTFQCFPVVSCMSRSLVQESTGGNTOVA |
| SLC26A6_X.laervis      | 318 | DIVGEIPTCMKAPMLENTNIFARVVGNAFAIIVVYAFTISLAKMFGVKHGYNDGNOELIATGLSNISIGSFFQCFITIGTAMSRSLVQESTGGHSOVA       |
| SLC26A6_A.japonica     | 310 | DVVGDIPTSGLNPEPTTETDISIFTEVIGDAFAMAVGYAINISLGTFAKHKGYKVDGNOELIATGLSNVVGFFQCYCVTSSMSRSLVQESTGGKTOVA       |
| SLC26A9_H.sapiens      | 310 | QIVGEIPTQRCFPTPVSPVVSQWKDMIGTAFSLAVVYVINLAMGRTLANKHGYDVDGNOEMIALGCNSFFGFFFKIHVICCALSVTLAVDAGGKSOVA       |
| SLC26A9_M.musculus     | 310 | QIVGEIPTQRCFPTPVSPVVSQWKDMIGTAFSLAVVYVINLAMGRTLANKHGYDVDGNOEMIALGCNSFFGFFFKIHVICCALSVTLAVDAGGKSOVA       |
| SLC26A2_H.sapiens      | 359 | SIACHIPITCFMPPKVPENLIPSAVDAIAIAISIIICFAITVSLSEMFAKKHGYTVKANOEYAI GFCNIIIPSFHCFITTSAAIAKTLVKESTGCQTOLS    |
| SLC26A2_E.caballus     | 361 | SIACHIPITCFMPPKAPDWNLIPSAVDAIAIAISIIICFAITVSLSEMFAKKHGYTVKANOEYAI GFCNIIIPSFHCFITTSAAIAKTLVKESTGCQSOLS   |
| SLC26A2_B.bubalis      | 354 | SIACHIPITCFMPPKAPDWNLIPRVAIDAIAIAIICFAITVSLSEMFAKKHGYTVKANOEYAI GFCNIIIPSFHCFITTSAAIAKTLVKESTGCQTOVS     |
| SLC26A2_B.taurus       | 354 | SIACHIPITCFMPPKAPDWNLIPRVAIDAIAIAIICFAITVSLSEMFAKKHGYTVKANOEYAI GFCNIIIPSFHCFITTSAAIAKTLVKESTGCQTOVS     |
| SLC26A2_M.musculus     | 359 | SIACHIPITCFMPPKAPDWSLIPNVAIDAIAIAISIIICFAITVSLSEMFAKKHGYTVKANOEYAI GFCNIIIPSFHCFITTSAAIAKTLVKESTGCQTOVS  |
| SLC26A2_R.norvegicus   | 359 | SIACQIPTCFMPPKAPDWSLIPNVAIDAIAIAISIIICFAITVSLSEMFAKKHGYTVKANOEYAI GFCNIIIPSFHCFITTSAAIAKTLVKESTGCQTOVS   |
| SLC26A2_C.intestinalis | 350 | RVVGPIPTCFPAPMLEDFSIMGSIIGDGFALAVVGFVAVSVLSKMYAKYGYSDGNOELIATGLCVSNVAFSFFRSCFPNAAALARCIVQENTGGNTOLV      |
| SLC26A10_H.sapiens     | 256 | QIVGLIPGCFPPQELLENLAELPRILADSLPIATVSVFVAVSASLAIHADKYSYTDGNOEFTAFHAGSNLISLFSFCFPNSATLATTNLLVDAGGKTOIA     |
| SLC26A10_D.rerio       | 239 | QIVGHIPTACFPPEPRIPALETVPEIAGDTVAITTVAYAVSVSLAMIYADKHYSDGNOEFTAFHAGSNLISLFSFCFPNSATLATTNLLVDAGGKTOIA      |
| SLC26A7_H.sapiens      | 285 | EVVGHIPQCIPSPRAPPMNLSAVITEAFGVAVVAVASLALAQSAKKFKYSIDDGNOEFTAFHAGSNLISLFSFCIPSAAMGRTAGLYSTGAKTOVA         |
| SLC26A7_M.musculus     | 285 | EVVGHIPNCPSPRAPPMNLSAVLTEAFGVAVVAVASLALAQSAKKFKYSVDGNOEFTAFHAGSNLISLFSFCIPSAAMGRTAGLYSTGAKTOVA           |
| SLC26A5_C.intestinalis | 325 | KIICEIPTSCFLPVTFPPVDFKFTSIIIGHAIPITAVGYVAVSIAKIFANFNGYKIRPNOELIATVAFASNLVVSFFFCFPAPFMSRSCVQVDSGGKTOVA    |

### Supplementary Fig. S2: Sequence alignment of the SLC26 transporters region encompassing TMD7 and TMD8.

Multiple sequence alignment of SLC26a2-10 shows high conservation of the Gly367 and Pro371 (red) residues. F368 (blue) is conserved in many SLC26 transporters. The pore Glu417 (pink) is highly conserved among the SLC26 transporters.
